# Supplementary material
Source: PubMed Central journal article supplement (PMC3098483)
Supplement: emboj2011111s1.pdf [file emboj2011111s1.pdf]

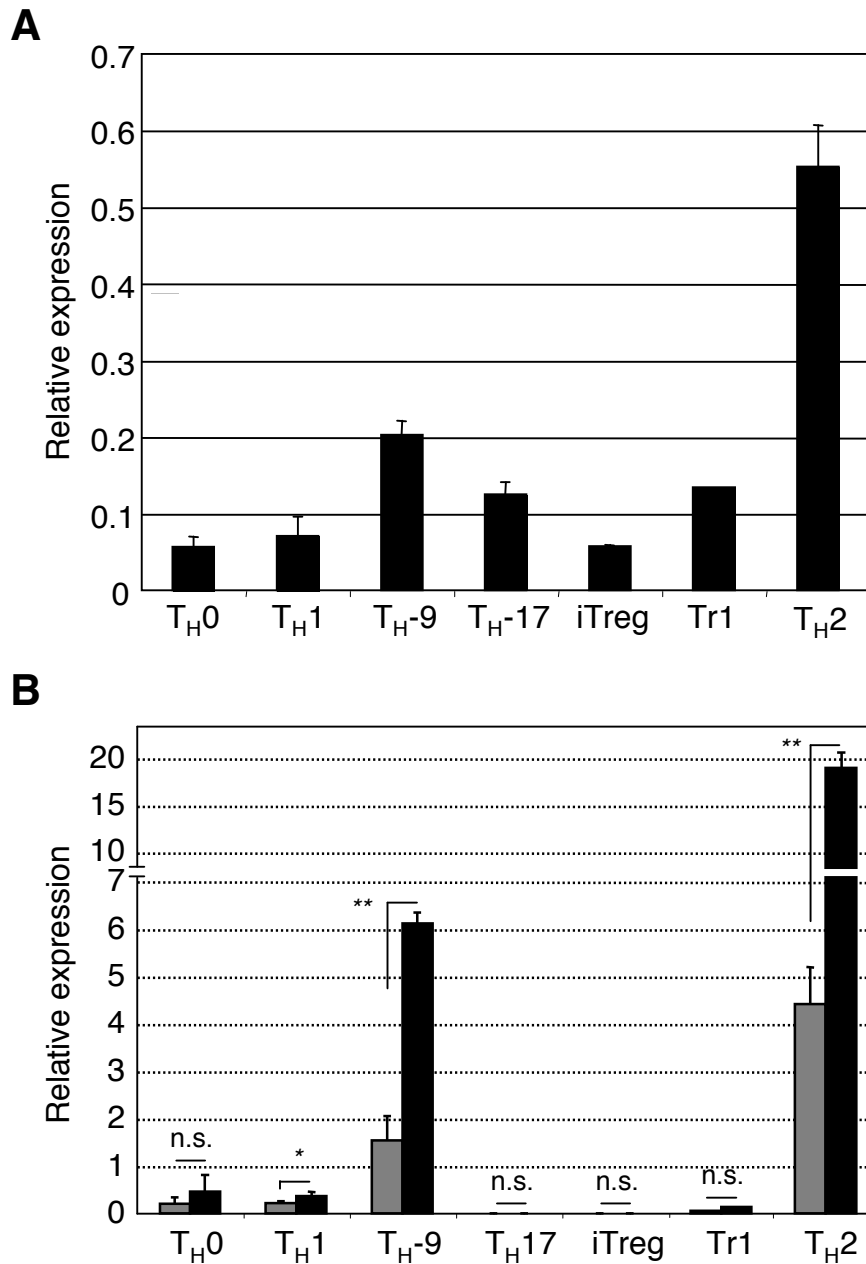

**Supplementary Figure 1 Expression of *Nfil3* and *Il13* genes in helper T cell lineages.** (A) Expression of *Nfil3* in helper T cells differentiated *in vitro*. Quantitative real-time RT-PCR was performed to determine the level of expression of *Nfil3* gene in each helper T cell lineages. (B) Enhanced expression of the *Il13* gene in helper T cells in the absence of NFIL3. Quantitative real-time RT-PCR was performed to determine the level of expression of the *Il13* gene in WT and *Nfil3*<sup>-/-</sup> helper T cells. Data show the mean and s.d. from at least three experiments. \* $p < 0.05$ , \*\* $p < 0.0001$ , n.s.: not significant.

## Supplementary Figure 2

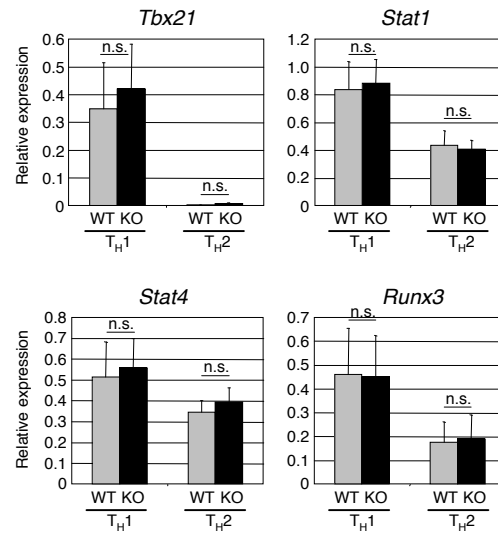

**Supplementary Figure 2 Expression of transcription factors in *Nfil3*<sup>-/-</sup> TH1 cells.** Quantitative real-time RT-PCR was performed to determine the level of expression of TH1 transcription factors. Data show the mean and s.d. from three experiments. n.s.: not significant.

# Supplementary Figure 3

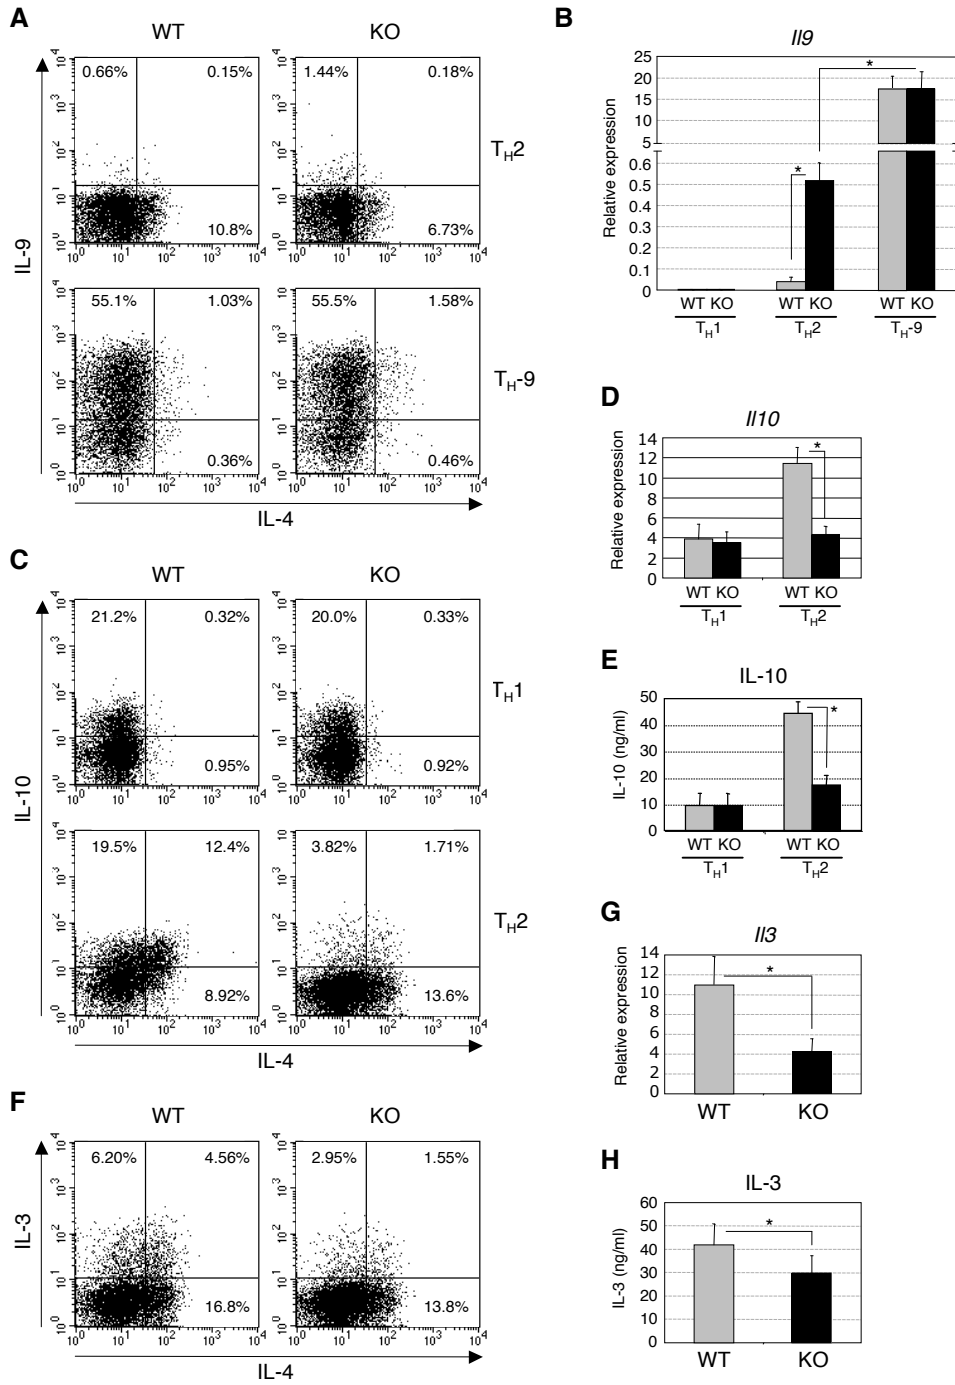

**Supplementary Figure 3 Altered IL-9, IL-10, and IL-3 production in *Nfil3*<sup>-/-</sup> T<sub>H</sub>2 cells** (A) Intracellular staining for IL-9 of T<sub>H</sub>2 and T<sub>H</sub>-9 cells. Restimulated cells were stained and analyzed by flow cytometry. Data are representative of three experiments with similar results. (B) Increased expression of *Il9* mRNA in *Nfil3*<sup>-/-</sup> T<sub>H</sub>2 cells. Expression of mRNA was determined by quantitative real-time RT-PCR. Data show the mean and s.d. from three experiments (\**p* < 0.001). (C) Intracellular staining for IL-10 of T<sub>H</sub>1 and T<sub>H</sub>2 cells. Restimulated cells were stained and analyzed by flow cytometry. Data are representative of four experiments with similar results. (D) Decreased expression of *Il10* mRNA in *Nfil3*<sup>-/-</sup> T<sub>H</sub>2 cells. Expression of mRNA was determined by quantitative real-time RT-PCR. Data show the mean and s.d. from four experiments (\**p* < 0.001). (E) Decreased secretion of IL-10 by T<sub>H</sub>1 and T<sub>H</sub>2 cells restimulated with anti-CD3/CD28 for 24 hours. Cytokine concentration was determined by ELISA and data show the mean and s.d. from four experiments (\**p* < 0.01). (F) Intracellular staining for IL-3 of T<sub>H</sub>2 cells. Restimulated cells were stained and analyzed by flow cytometry. Data are representative of four experiments with similar results. (G) Decreased expression of *Il3* mRNA in *Nfil3*<sup>-/-</sup> T<sub>H</sub>2 cells. Quantitative real-time RT-PCR was performed to determine the level of expression of *Il3* mRNA. Data show the mean and s.d. from four experiments (\**p* < 0.1). (H) Decreased secretion of IL-3 by *Nfil3*<sup>-/-</sup> T<sub>H</sub>2 cells restimulated with anti-CD3/CD28 for 24 hours. Cytokine concentration was determined by ELISA and data show the mean and s.d. from four experiments (\**p* < 0.1).

## Supplementary Figure 4

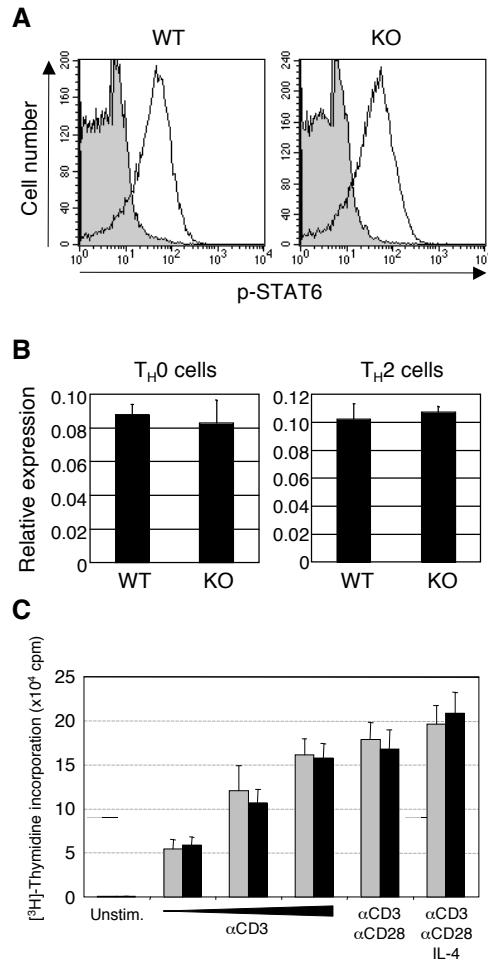

### Supplementary Figure 4 Normal IL-4 signaling, *Il4ra* expression, and proliferation of *Nfil3*<sup>-/-</sup> T cells.

(A) Purified splenic CD4<sup>+</sup> T cells from WT and *Nfil3*<sup>-/-</sup> mice were unstimulated (shaded histogram) or stimulated (open histogram) with IL-4 for 20 min and analyzed for intracellular expression of phospho-STAT6 by flow cytometry. Three experiments were performed with similar results. (B) Expression of *Il4ra* gene in T<sub>H</sub>0 and T<sub>H</sub>2 cells was determined by quantitative real-time RT-PCR. Data show the mean and s.d. from three experiments. (C) Thymidine incorporation by CD4<sup>+</sup> T cells from WT (gray bars) and *Nfil3*<sup>-/-</sup> mice (black bar) in response to stimulation indicated. Mean values of [<sup>3</sup>H]-thymidine incorporation are indicated. Two experiments were performed with similar results.

## Supplementary Figure 5

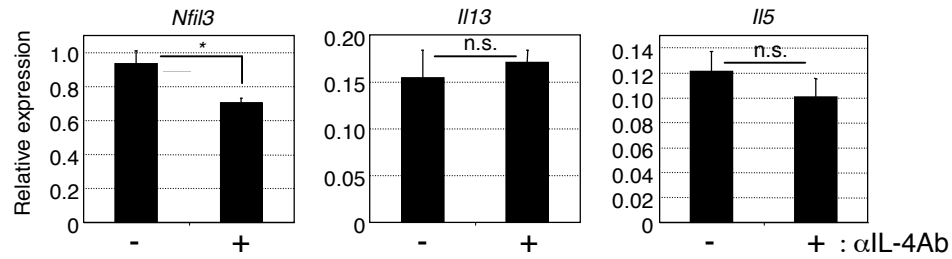

**Supplementary Figure 5 IL-4 does not negatively regulate *Il13* and *Il5* expression in differentiated TH2 cells.** Quantitative real-time RT-PCR was performed to determine the level of expression of *Nfil3*, *Il13*, *Il5* genes after neutralization of IL-4 by αIL-4 antibody in TH2 T cells. Data show the mean and s.d. from three experiments. \* $p < 0.01$ , n.s. not significant.

## Supplementary Figure 6

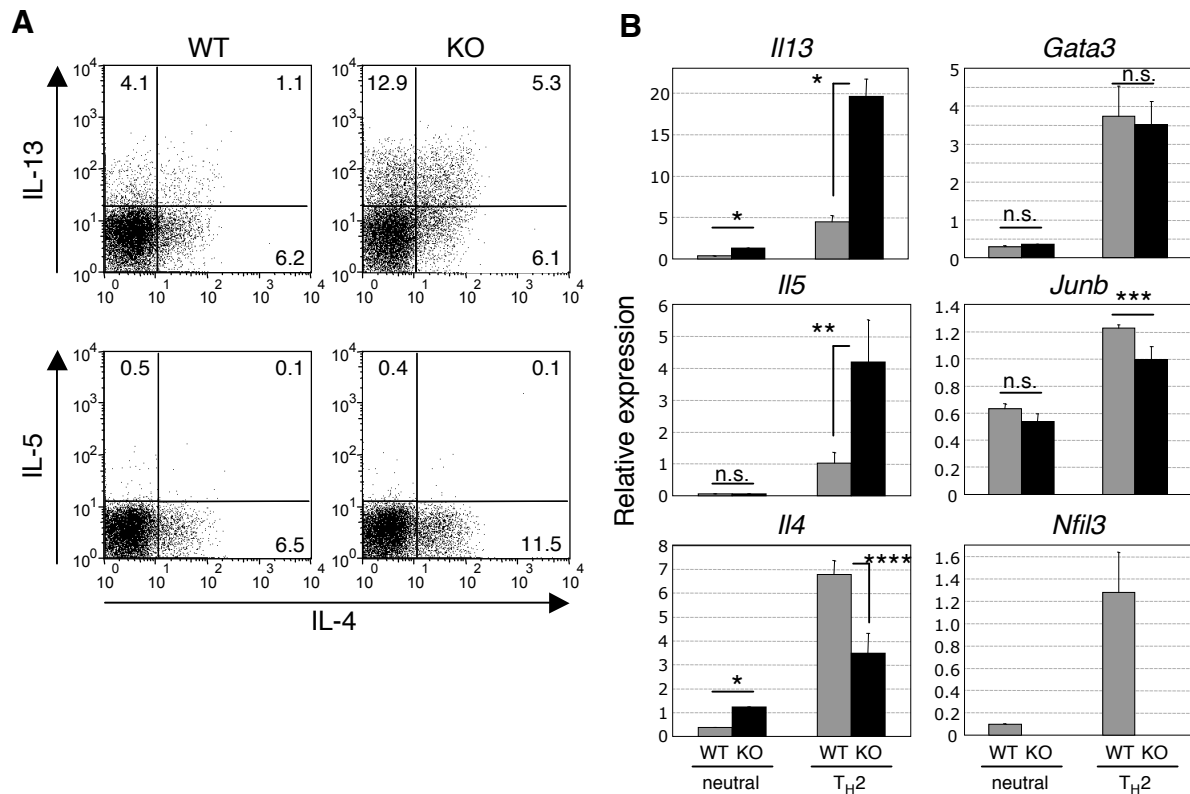

**Supplementary Figure 6 Altered T<sub>H</sub>2 cytokine production in *Nfil3*<sup>-/-</sup> T cells cultured under neutral conditions.** (A) Increased IL-13 and IL-4 production in *Nfil3*<sup>-/-</sup> T cells. CD4<sup>+</sup> T cells cultured under neutral conditions were restimulated with PMA/ionomycin, and cytokine production was determined by intracellular staining. Data are representative of three experiments with similar results. (B) Increased expression of *Il13* and *Il4* mRNA in *Nfil3*<sup>-/-</sup> T cells. Expression of mRNA was determined by quantitative real-time RT-PCR. Data show the mean and s.d. from three experiments (\* $p < 0.0001$ , \*\* $p < 0.005$ , \*\*\* $p < 0.02$ , \*\*\*\* $p < 0.002$ ).

## Supplementary Figure 7

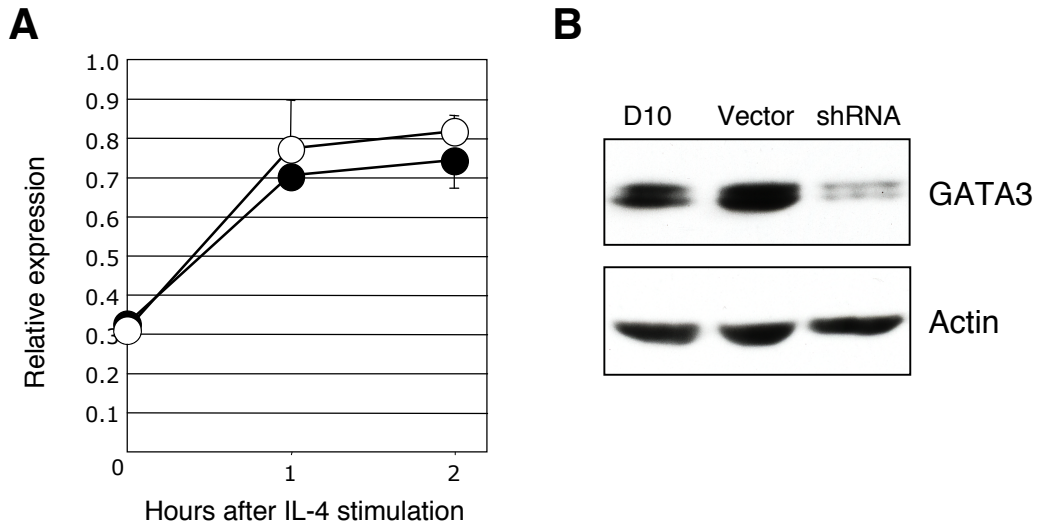

**Supplementary Figure 7 GATA3 is not required for *Nfil3* expression.** (A) Quantitative real-time RT-PCR was performed to determine the level of expression of *Nfil3* in GATA3-knocked down T<sub>H</sub>2 cells. Data show the mean and s.d. from three experiments. (B) Western blot analysis of GATA3 protein in GATA3-knocked down D10.G4.1 cells. Three experiments were performed with similar results.



## Supplementary Figure 8

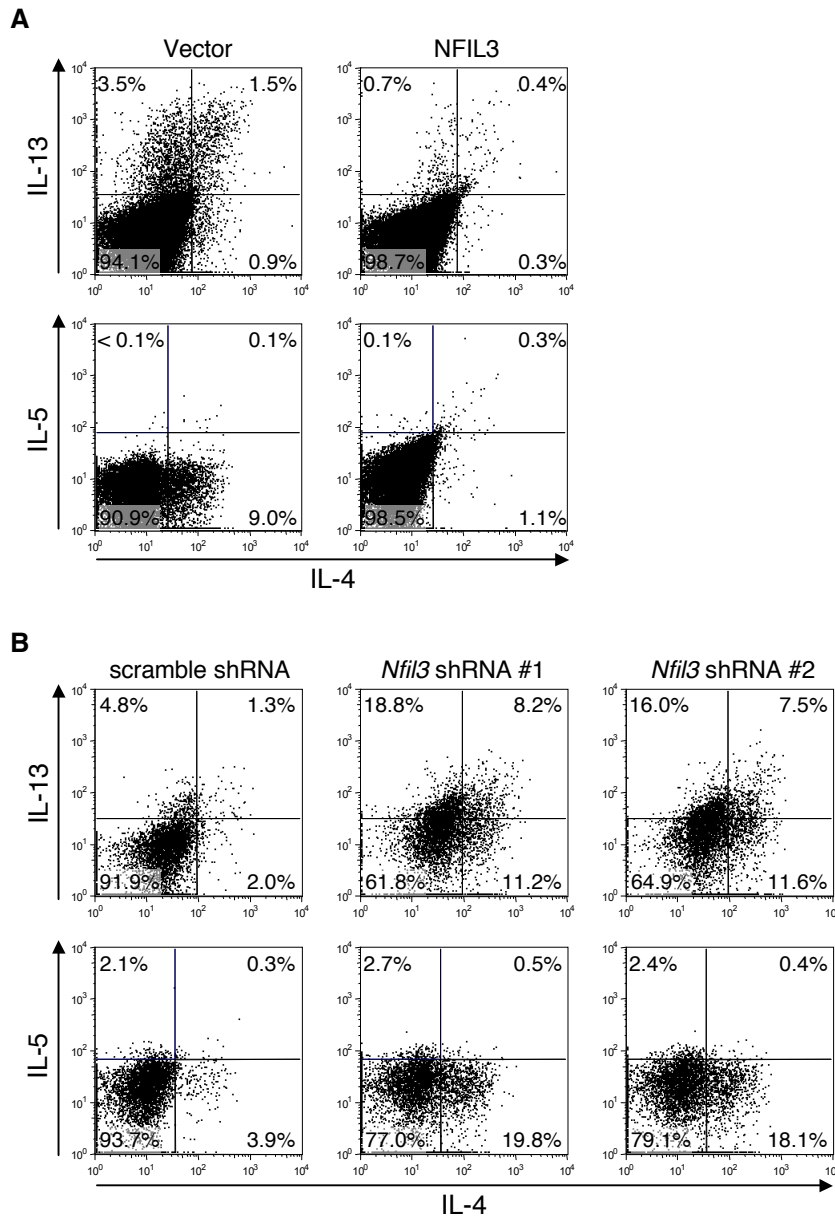

### Supplementary Figure 8 Altered $T_H2$ cytokine production by NFIL3 overexpression and *Nfil3* knockdown during the late stage of $T_H2$ differentiation.

(A) Splenic  $CD4^+$  T cells from *Nfil3*<sup>-/-</sup> mice cultured under  $T_H2$  conditions for 6 days were infected with retroviruses carrying NFIL3 or empty vector. Infected cells were cultured for an additional 2 days under  $T_H2$  conditions and then restimulated with PMA/ionomycin in the presence of Brefeldin A to examine cytokine production by intracellular staining. Data are representative of two experiments with similar results. (B) Splenic  $CD4^+$  T cells from *Nfil3*<sup>+/+</sup> mice cultured under  $T_H2$  conditions for 6 days were infected with lentivirus carrying *Nfil3* shRNA or scramble shRNA. Infected cells were cultured for an additional 2 days under  $T_H2$  conditions and then restimulated with PMA/ionomycin in the presence of Brefeldin A to examine cytokine production by intracellular staining. Data are representative of two experiments with similar results.

## Supplementary Figure 9

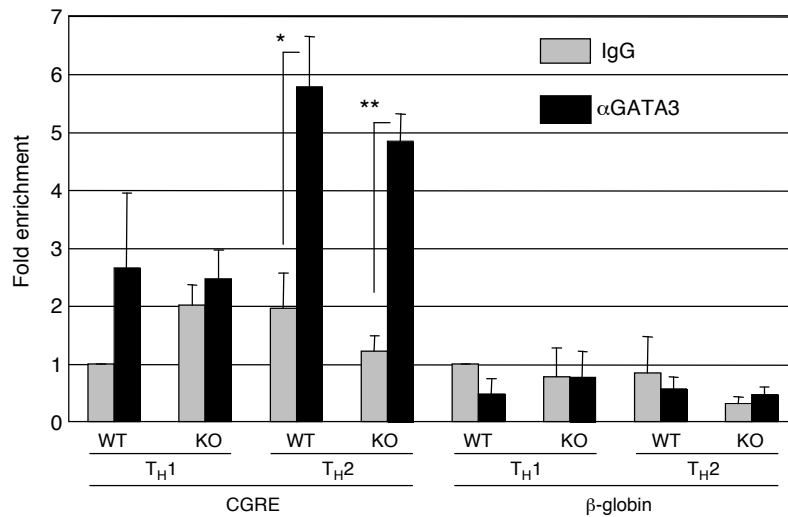

**Supplementary Figure 9 GATA3 binding activity to CGRE is not affected by NFIL3.** Splenic CD4<sup>+</sup> T cells from WT and *Nfil3*<sup>-/-</sup> mice cultured under T<sub>H</sub>1 and T<sub>H</sub>2 conditions for 7 days were crosslinked and soluble chromatin complexes were immunoprecipitated by anti-GATA3 antibody or control IgG. The region including CGRE in the co-precipitated DNA was amplified by PCR. The  $\beta$ -globin gene was used as a negative control. The average and s.d. of enrichment from three experiments were indicated (\*  $p < 0.05$ , \*\*  $p < 0.005$ ).

## Supplementary Figure 10

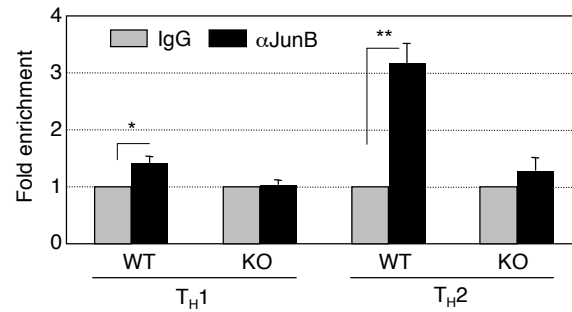

### Supplementary Figure 10 JunB binding to the *Il4* promoter in $T_H1$ and $T_H2$ cells.

Splenic  $CD4^+$  T cells from WT and *Nfil3*<sup>-/-</sup> mice cultured under  $T_H1$  and  $T_H2$  conditions for 7 days were crosslinked and soluble chromatin complexes were immunoprecipitated by anti-JunB antibody or control IgG. The *Il4* promoter region in the co-precipitated DNA was amplified by PCR. The average and s.d. of enrichment from three experiments were indicated (\*  $p < 0.005$ , \*\*  $p < 0.0005$ ).

## Supplementary Figure 11

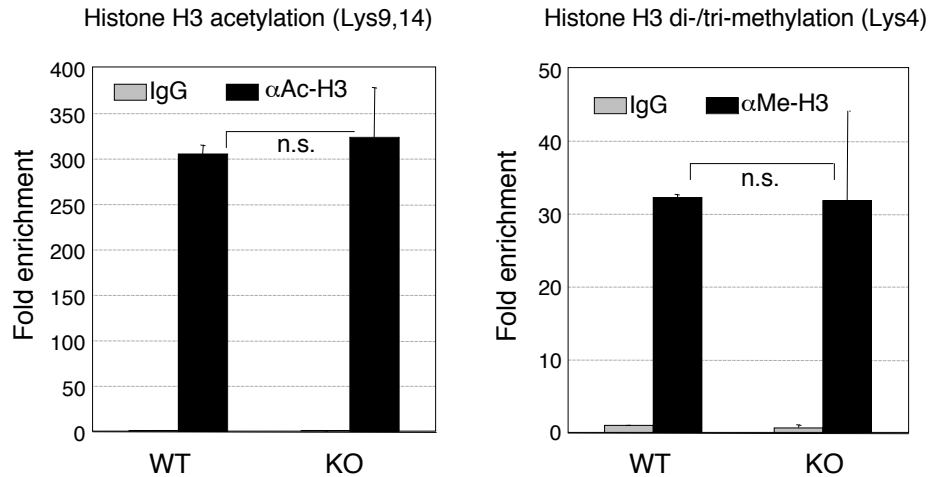

### Supplementary Figure 11 Chromatin modification in the *Il4* promoter region.

Splenic CD4 T cells from WT and *Nfil3*<sup>-/-</sup> mice cultured under T<sub>H</sub>2 conditions for 7 days were crosslinked and soluble chromatin complexes were immunoprecipitated by anti-acetyl Histone H3, anti-di + tri methyl Histone H3, or control IgG. The promoter region of the *Il4* gene in the coprecipitated DNA was amplified by PCR. The average and s.d. of enrichment from three experiments were indicated (n.s.: not significant).

## Supplementary Figure 12

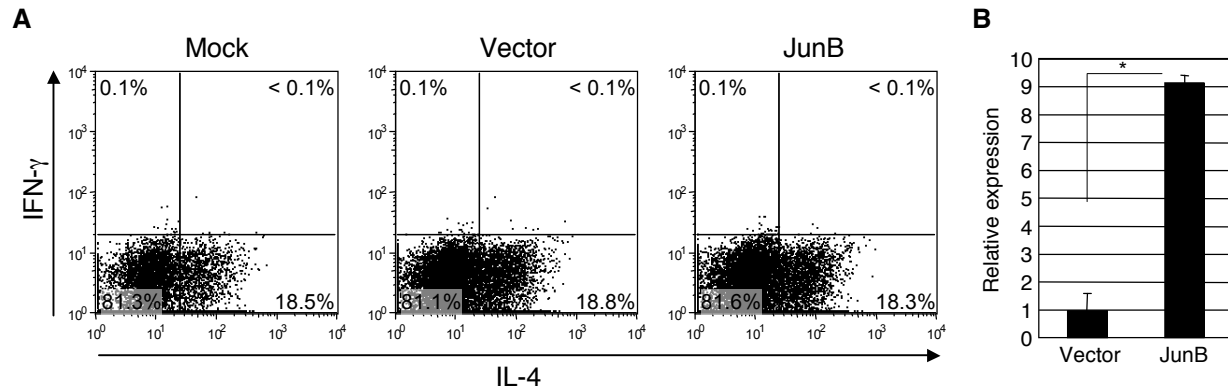

### Supplementary Figure 12 JunB transduction into *Nfil3*<sup>-/-</sup> T<sub>H</sub>2 cells does not restore IL-4 production.

(A) Splenic CD4<sup>+</sup> T cells from *Nfil3*<sup>-/-</sup> mice cultured under T<sub>H</sub>2 conditions for 6 days were infected with lentiviruses carrying JunB or empty vector. Infected cells were cultured for an additional 2 days under T<sub>H</sub>2 conditions and then restimulated with PMA/ionomycin in the presence of Brefeldin A to examine cytokine production by intracellular staining. Data are representative of two experiments with similar results. (B) Relative expression of *Junb* in *Nfil3*<sup>-/-</sup> T<sub>H</sub>2 cells after transduction of JunB-expressing virus. The average and s.d. from two experiments were indicated (\**p* < 0.001).

**Supplementary Table 1 Primers for real-time PCR**

**RT-PCR**

| Primer                 | Sequence (5' to 3')       |
|------------------------|---------------------------|
| <i>Nfil3</i> forward   | GAACTCTGCCTTAGCTGAGGT     |
| <i>Nfil3</i> reverse   | ATTCCCGTTTTCTCCGACACG     |
| <i>Hprt1</i> forward   | GTTGGATACAGGCCAGACTTTGTTG |
| <i>Hprt1</i> reverse   | GATTCAACTTGCCTCATCTTAGGC  |
| <i>Il13</i> forward    | CCTGGCTCTTGCTTGCCTT       |
| <i>Il13</i> reverse    | GGTCTTGTGTGATGTTGCTCA     |
| <i>Il4</i> forward     | GGTCTCAACCCCAGCTAGT       |
| <i>Il4</i> reverse     | GCCGATGATCTCTCTCAAGTGAT   |
| <i>Il5</i> forward     | CTCTGTTGACAAGCAATGAGACG   |
| <i>Il5</i> reverse     | TCTTCAGTATGTCTAGCCCCTG    |
| <i>Il9</i> forward     | AAGGATGATCCACCGTCAAAATG   |
| <i>Il9</i> reverse     | ACCCGATGGAAAACAGGCAAG     |
| <i>Il3</i> forward     | GGGATACCCACCGTTTAACCA     |
| <i>Il3</i> reverse     | AGGTTTACTCTCCGAAAGCTCTT   |
| <i>Il10</i> forward    | GCTCTTACTGACTGGCATGAG     |
| <i>Il10</i> reverse    | CGCAGCTCTAGGAGCATGTG      |
| <i>Ifng</i> forward    | GAAGTGGCAAAGGATGGTGA      |
| <i>Ifng</i> reverse    | TGTGGGTTGTTGACCTCAAAC     |
| <i>Gata3</i> forward   | CTCGGCCATTCGTACATGGAA     |
| <i>Gata3</i> reverse   | GGATACCTCTGCACCGTAGC      |
| <i>Junb</i> forward    | TCACGACGACTCTTACGCAG      |
| <i>Junb</i> reverse    | CCTTGAGACCCCGATAGGGA      |
| <i>Stat6</i> forward   | CTCTGTGGGGCCTAATTTCCA     |
| <i>Stat6</i> reverse   | CATCTGAACCGACCAGGAACT     |
| <i>Bhlhe41</i> forward | TGTGTAAACCCAAAAGGAGCTT    |
| <i>Bhlhe41</i> reverse | TGTTCCGGGCAGTAAATCTTTCAG  |
| <i>Maf</i> forward     | AGCAGTTGGTGACCATGTCTG     |
| <i>Maf</i> reverse     | TGGAGATCTCCTGCTTGAGG      |
| <i>Jund</i> forward    | GGCGGGATTGAAACCAGGG       |
| <i>Jund</i> reverse    | AGCCCGTTGGACTGGATGA       |
| <i>Fosl1</i> forward   | ATGTACCGAGACTACGGGGAA     |
| <i>Fosl1</i> reverse   | CTGCTGCTGTCGATGCTTG       |
| <i>Fosl2</i> forward   | CCAGCAGAAGTTCGGGGTAG      |
| <i>Fosl2</i> reverse   | GTAGGGATGTGAGCGTGGATA     |
| <i>Nfatc1</i> forward  | TCTTCGAGTTCGATCAGAGCG     |
| <i>Nfatc1</i> reverse  | TGACACTAGGGGACACATAACTG   |
| <i>Mina</i> forward    | CAGTAGGGCCAGATAAGAATCCAT  |
| <i>Mina</i> reverse    | CATGTGCATCTGCCTCACATT     |
| <i>Tbx21</i> forward   | AGCAAGGACGGCGAATGTT       |
| <i>Tbx21</i> reverse   | GGGTGGACATATAAGCGGTTC     |
| <i>Stat1</i> forward   | TCACAGTGGTTCGAGCTTCAG     |
| <i>Stat1</i> reverse   | GCAAACGAGACATCATAGGCA     |

|                      |                         |
|----------------------|-------------------------|
| <i>Stat4</i> forward | TGGCAACAATTCTGCTTCAAAAC |
| <i>Stat4</i> reverse | GAGGTCCCTGGATAGGCATGT   |
| <i>Runx3</i> forward | CAGGTTCAACGACCTTCGATT   |
| <i>Runx3</i> reverse | GTGGTAGGTAGCCACTTGGG    |
| <i>Il4ra</i> forward | TGGATCTGGGAGCATCAAGGT   |
| <i>Il4ra</i> reverse | TGGAAGTGCGGATGTAGTCAG   |
| <i>Irf4</i> forward  | TCCGACAGTGGTTGATCGAC    |
| <i>Irf4</i> reverse  | CCTCACGATTGTAGTCCTGCTT  |
| <i>Sfp1</i> forward  | ATGTTACAGGCGTGCAAAATGG  |
| <i>Sfp1</i> reverse  | TGATCGCTATGGCTTTCTCCA   |
| <i>Pias1</i> forward | GCGGACAGTGCGGAATAAA     |
| <i>Pias1</i> reverse | ATGCAGGGCTTTTGTAAGAAGT  |

---

## ChIP

| Primer                       | Sequence (5' to 3')              |
|------------------------------|----------------------------------|
| CGRE forward                 | TGGGACACTGATCCAGCGGTCCAG         |
| CGRE reverse                 | CTCAAGACAAGCAGAAGGCATGCG         |
| <i>Il13</i> promoter forward | GCTGGCTGCTCAGGAGCTT              |
| <i>Il13</i> promoter reverse | GGACAGGGTTTCCAGGTTCTG            |
| <i>Il13</i> intron forward   | GTGAGTAGCACACACAGCCCCTCC         |
| <i>Il13</i> intron reverse   | TGATAAACAGTGGTCGCCACTCC          |
| <i>Il4</i> promoter forward  | GGGAGGGGTGTTTCATTTTC             |
| <i>Il4</i> promoter reverse  | CAATAGCTCTGTGCCGTCAG             |
| $\beta$ -globin forward      | GCCTTGCCTGTTCTGCTC               |
| $\beta$ -globin reverse      | CAGACCATAAACTGTATTTTCTTATTGAGCCC |

---
